# Supplementary material for: Carrying asymptomatic gallstones is not associated with changes in intestinal microbiota composition and diversity but cholecystectomy with significant dysbiosis
Source: PubMed Central journal article supplement (PMC7988160; doi:10.1038/s41598-021-86247-6), 2021-03-23
Supplement: 41598_2021_86247_MOESM1_ESM.pdf [file 41598_2021_86247_MOESM1_ESM.pdf]

# **Carrying asymptomatic gallstones is not associated with changes in intestinal microbiota composition and diversity but cholecystectomy with significant dysbiosis**

Fabian Frost<sup>1</sup>; Tim Kacprowski<sup>2</sup>; Malte Rühlemann<sup>3</sup>; Stefan Weiss<sup>4</sup>, Corinna Bang<sup>3</sup>; Andre Franke<sup>3</sup>; Maik Pietzner<sup>5</sup>; Ali A Aghdassi<sup>1</sup>; Matthias Sendler<sup>1</sup>, Uwe Völker<sup>4</sup>; Henry Völzke<sup>6</sup>; Julia Mayerle<sup>1,7</sup>; Frank U Weiss<sup>1</sup>; Georg Homuth<sup>4</sup> & Markus M Lerch<sup>1</sup>

## **Authors institutions:**

- 1) Department of Medicine A, University Medicine Greifswald, Greifswald, Germany
- 2) Division Data Science in Biomedicine, Peter L. Reichertz Institute of TU Braunschweig and Medical School Hannover, Braunschweig, Germany
- 3) Institute of Clinical Molecular Biology, Christian Albrechts University of Kiel, Kiel, Germany
- 4) Department of Functional Genomics, Interfaculty Institute for Genetics and Functional Genomics, University Medicine Greifswald, Greifswald, Germany
- 5) Institute of Clinical Chemistry and Laboratory Medicine, University Medicine Greifswald, Greifswald, Germany
- 6) Institute for Community Medicine, University Medicine Greifswald, Greifswald, Germany
- 7) Department of Medicine II, University Hospital, LMU Munich, Germany

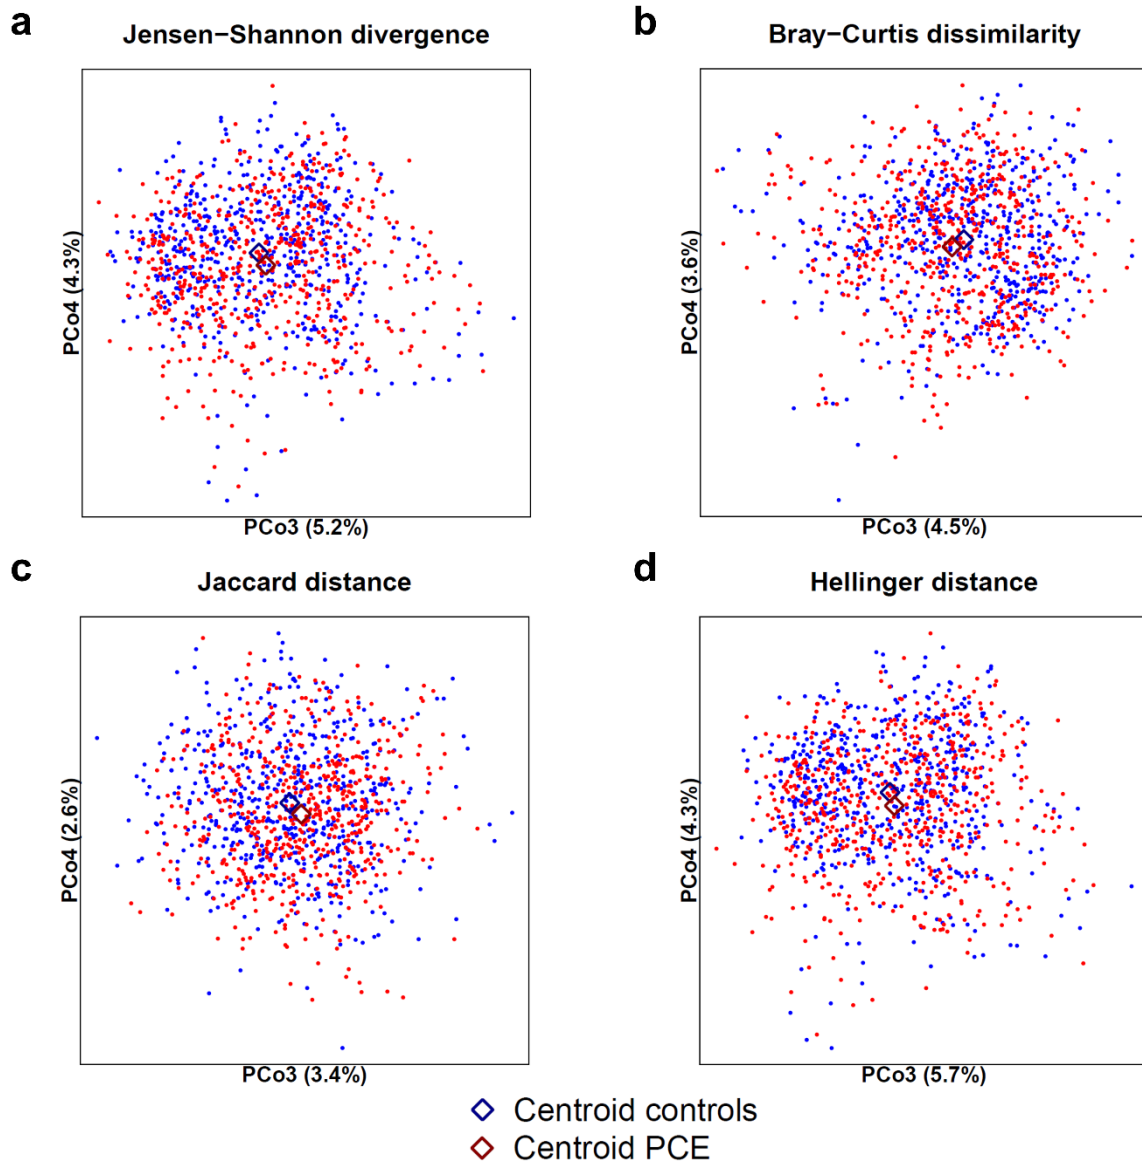

**Fig. S1:** Principal coordinate analysis (PCoA) of gut microbiota profiles from individuals post-cholecystectomy (PCE,  $n=580$ , red color) and matched controls ( $n=580$ , blue color). Shown are PCo3 and PCo4 of 1,160 gut microbiota samples. PCoA was performed based on **(a)** Jensen-Shannon divergence, **(b)** Bray-Curtis dissimilarity, **(c)** Jaccard distance, or **(d)** Hellinger distance.

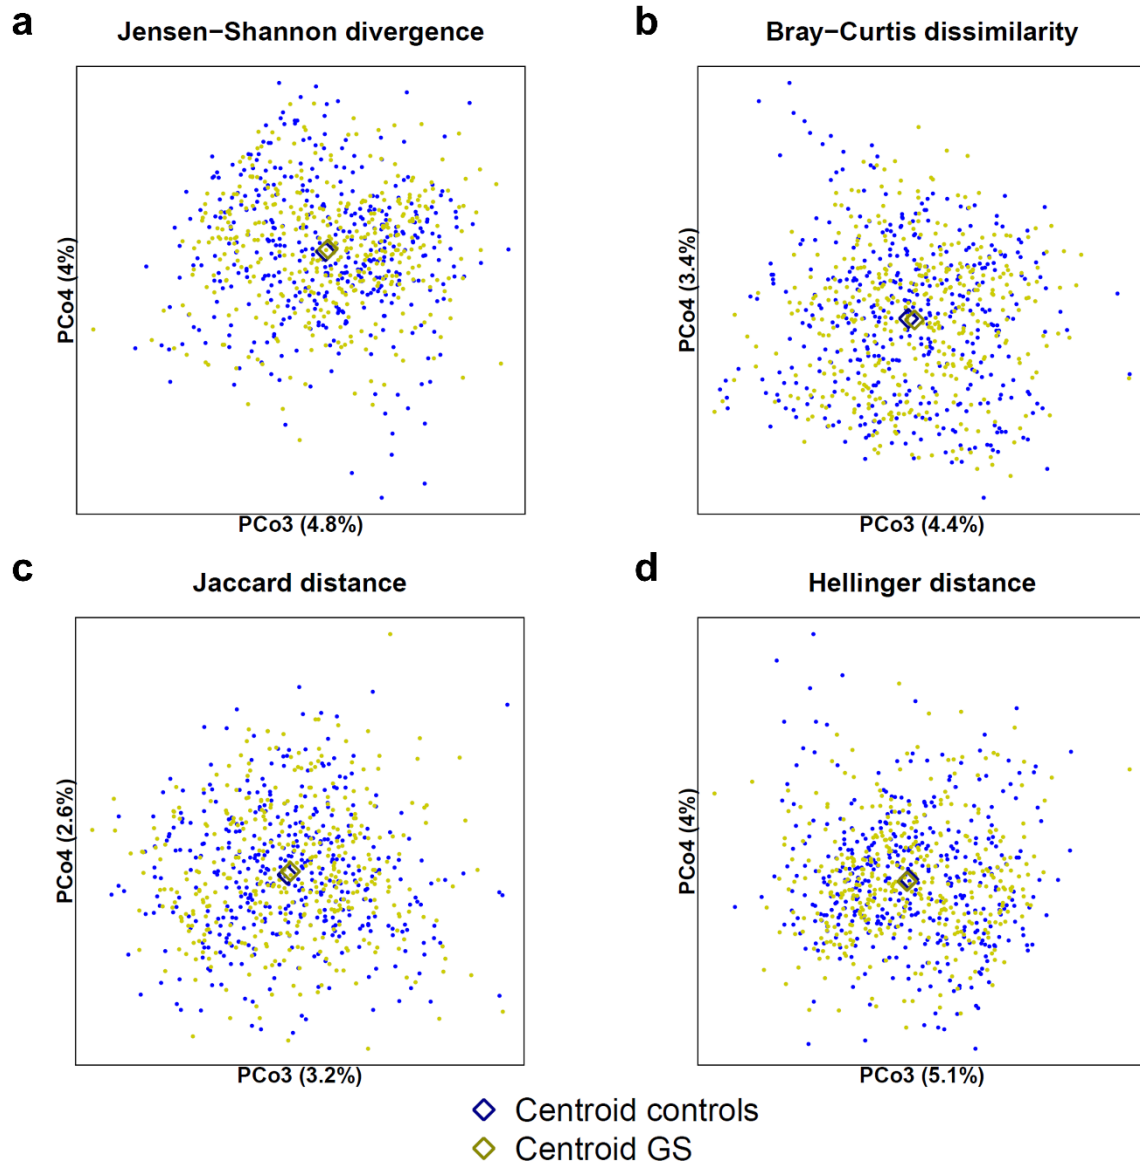

**Fig. S2:** Principal coordinate analysis (PCoA) of gut microbiota profiles from gallstone carriers (GC, n=404, yellow color) and matched controls (n=404, blue color). Shown are PCo3 and PCo4 of 808 gut microbiota samples. PCoA was performed based on **(a)** Jensen-Shannon divergence, **(b)** Bray-Curtis dissimilarity, **(c)** Jaccard distance, or **(d)** Hellinger distance.
